# Supplementary material for: Sm-CeO2/Zeolite Bifunctional Catalyst for Direct and Highly Selective Conversion of Bioethanol to Propylene
Source: MDPI journal article supplement (doi:10.3390/catal12040407), 2022-04-06
Supplement: s1 [file s1]

# Sm-CeO<sub>2</sub>/Zeolite Bifunctional Catalyst for Direct and Highly Selective Conversion of Bioethanol to Propylene

Huan Jin <sup>1</sup>, Changxi Miao <sup>2,\*</sup>, Yinghong Yue <sup>1</sup>, Chao Tian <sup>1</sup>, Weiming Hua <sup>1,\*</sup> and Zi Gao <sup>1</sup>

<sup>1</sup> Shanghai Key Laboratory of Molecular Catalysis and Innovative Materials, Department of Chemistry, Fudan University, Shanghai 200438, China; 17110220026@fudan.edu.cn (H.J.); yhyue@fudan.edu.cn (Y.Y.); 21110220105@m.fudan.edu.cn (C.T.); zigao@fudan.edu.cn (Z.G.)

<sup>2</sup> Shanghai Research Institute of Petrochemical Technology SINOPEC, Shanghai 201208, China

\* Correspondence: miaocx.sshy@sinopec.com (C.M.); wmhua@fudan.edu.cn (W.H.); Tel.: +86-21-31249121 (W.H.)

**Abstract:** A series of Sm-CeO<sub>2</sub>/Beta composites with various Beta contents were prepared by an incipient impregnation method, followed by calcination at 650 °C. They were characterized by XRD, N<sub>2</sub> adsorption, SEM, NH<sub>3</sub>-TPD, CO<sub>2</sub>-TPD and <sup>27</sup>Al MAS NMR. The Sm-CeO<sub>2</sub>/Beta bifunctional catalysts exhibit eminent catalytic performances in the selective conversion of ethanol to propylene. In particular, the Sm-CeO<sub>2</sub>/10%Beta catalyst with 10% Beta zeolite gives the highest C<sub>3</sub>H<sub>6</sub> yield of 59.3%. A good match between Sm-CeO<sub>2</sub> and Beta accounts for its optimal result.

**Keywords:** bioethanol; Sm-CeO<sub>2</sub>/Zeolite bifunctional catalyst; renewable propylene

---

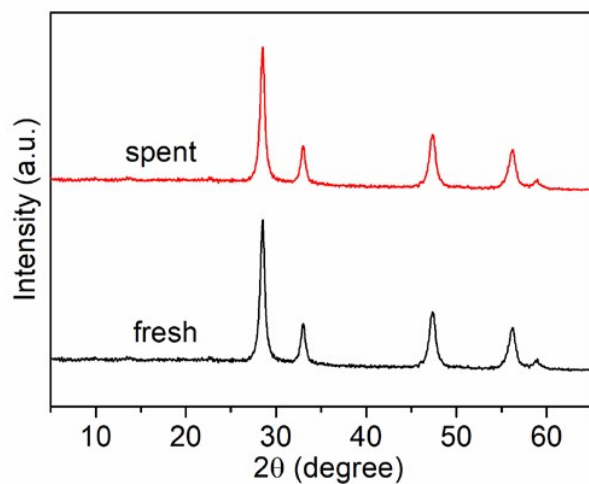

**Figure S1.** XRD patterns of SmCe/10%Beta before and after the stability test.

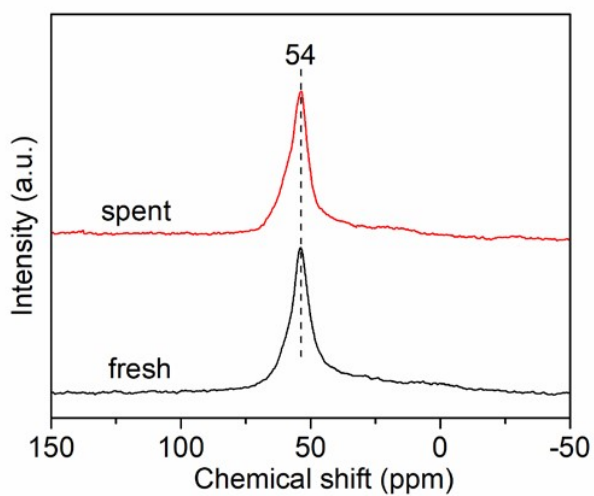

**Figure S2.**  $^{27}\text{Al}$  MAS NMR spectra of the SmCe/10%Beta catalyst before and after the stability test.

**Table S1.** Propylene yield of some catalysts for the ETP reaction in reported literature <sup>a</sup>.

| Catalyst                                | Weight<br>(g) | Temp.<br>(°C) | Space velocity<br>(h <sup>-1</sup> ) | Yield<br>(%) <sup>b</sup> | Stability          | Reference |
|-----------------------------------------|---------------|---------------|--------------------------------------|---------------------------|--------------------|-----------|
| Sm-CeO <sub>2</sub> /Beta               | 0.3           | 440           | WHSV = 0.52                          | 59                        | maintain for 120 h | this work |
| P modified HZSM-5                       | 0.3           | 550           | WHSV = 6                             | 32                        | maintain for 6 h   | 5         |
| F modified HZSM-5                       | 0.3           | 500           | WHSV = 10                            | 25                        | ~18% after 80 h    | 12        |
| Y-CeO <sub>2</sub>                      | 2.0           | 430           | WHSV = 0.43                          | 30                        | maintain for 56 h  | 13        |
| Y-ZrO <sub>2</sub>                      | 0.72          | 450           | WHSV = 0.91                          | 44 <sup>c</sup>           | –                  | 16        |
| Sc-In <sub>2</sub> O <sub>3</sub> /Beta | 0.8           | 460           | WHSV = 0.2                           | 50                        | maintain for 60 h  | 18        |
| ZnCeO <sub>x</sub> /Beta                | 1.1           | 450           | GHSV = 670                           | 55                        | ~50% after 30 h    | 19        |

<sup>a</sup> The ethanol conversion is 100%. P = 0.1 MPa; <sup>b</sup> Initial propylene yield; <sup>c</sup> P = 1.11 MPa.
